# Supplementary material for: Urinary Kininogen-1 and Retinol binding protein-4 respond to Acute Kidney Injury: predictors of patient prognosis?
Source: PubMed Central journal article supplement (PMC4726181; doi:10.1038/srep19667), 2016-01-21
Supplement: srep19667-s1.pdf [file srep19667-s1.pdf]

## **Urinary Kininogen-1 and Retinol binding protein-4 respond to Acute Kidney Injury: predictors of patient prognosis?**

Laura Gonzalez-Calero<sup>1</sup>, Marta Martin-Lorenzo<sup>1</sup>, Angeles Ramos-Barron<sup>2</sup>, Jorge Ruiz-Criado<sup>2</sup>, Aroa S. Maroto<sup>1</sup>, Alberto Ortiz<sup>3</sup>, Carlos Gomez-Alamillo<sup>2</sup>, Manuel Arias<sup>2</sup>, Fernando Vivanco<sup>1,4</sup>, Gloria Alvarez-Llamas<sup>1\*</sup>

<sup>1</sup> Department of Immunology, IIS-Fundacion Jimenez Diaz-UAM, REDinREN, Madrid, Spain.

<sup>2</sup> Nephrology Department, Valdecilla Hospital, University of Cantabria, Instituto de Formación e Investigación Marqués de Valdecilla, IDIVAL, Santander, Cantabria, Spain.

<sup>3</sup> Department of Nephrology/IRSIN, IIS-Fundación Jiménez Díaz, School of Medicine, UAM, Madrid, Spain.

<sup>4</sup> Department of Biochemistry and Molecular Biology I, Universidad Complutense, Madrid, Spain.

\*To whom correspondence should be addressed: Gloria Alvarez-Llamas, PhD. IIS-Fundacion Jimenez Diaz. Avenida Reyes Catolicos 2, 28040 Madrid (Spain). Phone N. +34 915504800. Fax N. +34 915448246. Email: galvarez@fjd.es

Email addresses: [laura.gcalero@fjd.es](mailto:laura.gcalero@fjd.es); [marta.martin@fjd.es](mailto:marta.martin@fjd.es); [ramosbarron@gmail.com](mailto:ramosbarron@gmail.com); [asanzmaroto@gmail.com](mailto:asanzmaroto@gmail.com); [aortiz@fjd.es](mailto:aortiz@fjd.es); [cgalamillo@gmail.com](mailto:cgalamillo@gmail.com); [nefarm@gmail.com](mailto:nefarm@gmail.com); [fvivanco@fjd.es](mailto:fvivanco@fjd.es); [galvarez@fjd.es](mailto:galvarez@fjd.es)

**Supplementary Table 1.** Clinical data of AKI patients. Urine samples were collected within the first 48h (1, Cr1), follow-up (2, Cr2) and at discharge (3, Cr3). For each patient, the approach (study) and time point (T) in which the urine sample was used is detailed: DIGE (discovery phase), WB (confirmation phase), SRM (confirmation phase) or ELISA (confirmation phase). Cr0: baseline serum creatinine, HTN: hypertension, CRF: chronic renal failure, CVD: cardiovascular disease, Cr: serum creatinine.

| <i>Patient N.</i> | <i>Analysis approach (T)</i> | <i>HTN</i> | <i>Diabetes</i> | <i>CKD</i> | <i>CVD</i> | <i>Cr1 (mg/dL)</i> | <i>Cr2 (mg/dL)</i> | <i>Cr3 (mg/dL)</i> |
|-------------------|------------------------------|------------|-----------------|------------|------------|--------------------|--------------------|--------------------|
| P1                | DIGE (1,2,3)                 | Yes        | Yes             | No         | Yes        | 3.1                | 1.2                | 0.9                |
| P2                | DIGE (1,2,3)                 | Yes        | No              | No         | No         | 9.1                | 1.6                | 1.2                |
| P3                | DIGE (1,2,3)                 | Yes        | Yes             | No         | No         | 5.2                | 3.7                | 1.2                |
| P4                | DIGE (1,2,3)                 | Yes        | No              | Yes        | No         | 7.9                | 3.4                | 2.2                |
| P5                | DIGE (1,2,3)                 | Yes        | No              | No         | Yes        | 3.4                | 2.9                | 1.7                |
| P6                | DIGE (1,2,3)                 | No         | No              | No         | No         | 8.0                | 7.5                | 6.4                |
| P7                | DIGE (1,2,3) ELISA (1,2,3)   | No         | No              | No         | Yes        | 4.8                | 2.0                | 1.5                |
| P8                | DIGE (1,2,3)                 | Yes        | No              | No         | Yes        | 1.5                | 1.1                | 1.0                |
| P9                | DIGE (1,2,3) ELISA (1,2,3)   | Yes        | Yes             | No         | Yes        | 8.1                | 7.8                | 1.2                |
| P10               | DIGE (1,2,3)                 | No         | No              | No         | No         | 2.2                | 2.0                | 1.5                |
| P11               | DIGE (1,2,3) ELISA (1,2,3)   | Yes        | No              | No         | Yes        | 9.7                | 7.7                | 5.0                |
| P12               | DIGE (1,2,3)                 | Yes        | No              | No         | No         | 6.2                | 7.3                | 6.5                |
| P13               | DIGE (1,2,3)                 | No         | No              | No         | No         | 2.0                | 1.2                | 0.9                |
| P14               | DIGE (1,2,3)                 | Yes        | No              | No         | Yes        | 3.1                | 2.7                | 1.7                |
| P15               | DIGE (1,2,3)                 | Yes        | Yes             | No         | Yes        | 2.0                | 1.8                | -                  |
| P16               | DIGE (1,2,3)                 | Yes        | Yes             | No         | No         | 9.8                | 7.1                | 0.9                |
| P17               | DIGE (1,2,3)                 | Yes        | Yes             | No         | No         | 1.6                | -                  | 1.0                |
| P18               | DIGE (1,2,3)                 | Yes        | Yes             | No         | Yes        | 12.5               | 9.2                | 4.3                |
| P19               | DIGE (1,2,3)                 | No         | No              | No         | No         | 9.0                | 3.1                | 1.5                |

|     |                                  |     |     |     |     |      |      |      |
|-----|----------------------------------|-----|-----|-----|-----|------|------|------|
| P20 | DIGE (1,2,3)                     | Yes | Yes | Yes | Yes | 3.2  | 2.8  | 2.3  |
| P21 | WB (1)                           | Yes | Yes | Yes | No  | 4.3  | 3.2  | 2.5  |
| P22 | WB (1)                           | Yes | No  | No  | No  | 6.5  | 2.7  | 1.2  |
| P23 | WB (1)                           | Yes | No  | No  | No  | 1.2  | 1.5  | -    |
| P24 | WB (1,2)                         | Yes | Yes | Yes | Yes | 2.5  | 3.0  | 4.2  |
| P25 | WB (1,2,3) ELISA (1,2,3)         | No  | Yes | No  | Yes | 4.8  | 1.4  | 0.9  |
| P26 | WB (1,2,3)                       | Yes | Yes | No  | Yes | 3.8  | 2.8  | 2.2  |
| P27 | WB (1,2,3) ELISA (1,2,3)         | Yes | No  | No  | No  | 4.2  | 2.5  | 1.9  |
| P28 | WB (1,2,3)                       | Yes | Yes | No  | Yes | 2.3  | 2.4  | 2.1  |
| P29 | WB (1,2,3)                       | No  | No  | No  | No  | 9.1  | 15.6 | 8.0  |
| P30 | WB (1,2,3)                       | No  | No  | No  | No  | 3.9  | 2.0  | 1.2  |
| P31 | WB (1,2,3) ELISA (1,2,3)         | Yes | Yes | No  | Yes | 9.2  | 1.2  | 0.9  |
| P32 | WB (1,2,3)                       | No  | No  | No  | No  | 3.8  | 5.5  | 1.7  |
| P33 | WB (1,2,3) ELISA (1,2,3)         | Yes | No  | No  | Yes | 4.4  | 4.3  | 3.9  |
| P34 | WB (2)                           | Yes | No  | Yes | Yes | 7.4  | 5.8  | 4.6  |
| P35 | WB (2)                           | Yes | No  | No  | Yes | 10.0 | 9.8  | 5.9  |
| P36 | WB (2,3)                         | Yes | No  | Yes | Yes | 10.1 | 4.5  | 3.4  |
| P37 | WB (2,3)                         | No  | No  | Yes | Yes | 4.4  | 5.1  | 4.7  |
| P38 | WB (2,3)                         | Yes | Yes | Yes | Yes | 5.8  | 6.8  | 3.7  |
| P39 | WB (3)                           | Yes | Yes | Yes | No  | 13.8 | 10.6 | 9.5  |
| P40 | WB (1,2,3) SRM (3)               | Yes | Yes | No  | Yes | 4.1  | 2.0  | 1.6  |
| P41 | WB (1,2,3) SRM (3)               | Yes | No  | No  | No  | 3.5  | 2.7  | 1.0  |
| P42 | WB (1,2,3) SRM (3) ELISA (1,2,3) | Yes | No  | Yes | No  | 23.4 | 10.3 | 10.0 |
| P43 | WB (1,2,3) SRM (1,2)             | Yes | No  | No  | No  | 5.6  | 2.5  | 1.3  |
| P44 | SRM (1)                          | No  | No  | Yes | Yes | 6.5  | 1.6  | 5.7  |
| P45 | SRM (1)                          | Yes | Yes | Yes | Yes | 2.1  | -    | 1.4  |
| P46 | SRM (1)                          | Yes | No  | Yes | Yes | 8.0  | 4.1  | 3.0  |
| P47 | SRM (1,2)                        | Yes | Yes | No  | Yes | 4.3  | 2.0  | 1.4  |

|     |           |     |     |     |     |      |      |      |
|-----|-----------|-----|-----|-----|-----|------|------|------|
| P48 | SRM (1,2) | No  | No  | Yes | No  | 6.1  | 7.5  | 8.9  |
| P49 | SRM (1,2) | Yes | No  | No  | No  | 5.1  | 2.7  | 1.0  |
| P50 | SRM (2)   | Yes | No  | No  | No  | 6.9  | 1.6  | -    |
| P51 | SRM (2)   | Yes | No  | No  | No  | 2.0  | 0.8  | 0.6  |
| P52 | SRM (2)   | No  | No  | No  | No  | 2.0  | 1.5  | 1.1  |
| P53 | SRM (3)   | Yes | Yes | Yes | Yes | 2.8  | 1.7  | 1.8  |
| P54 | SRM (3)   | Yes | Yes | Yes | Yes | 4.8  | 4.3  | 3.3  |
| P55 | SRM (3)   | No  | No  | No  | No  | 17.8 | 18.6 | 16.6 |

**Supplementary Table 2.** Control subjects and study in which they have been included.

| <i>Control N.</i>                | <i>Analysis approach</i> | <i>Age</i> | <i>Sex</i> |
|----------------------------------|--------------------------|------------|------------|
| <b><i>Discovery Phase</i></b>    |                          |            |            |
| 1                                | DIGE                     | 58         | F          |
| 2                                | DIGE                     | 36         | F          |
| 3                                | DIGE                     | 52         | M          |
| 4                                | DIGE                     | 26         | F          |
| 5                                | DIGE                     | 58         | F          |
| 6                                | DIGE                     | 48         | F          |
| 7                                | DIGE                     | 27         | F          |
| 8                                | DIGE, ELISA              | 39         | M          |
| 9                                | DIGE                     | 59         | F          |
| 10                               | DIGE, ELISA              | 55         | F          |
| 11                               | DIGE, ELISA              | 27         | F          |
| 12                               | DIGE                     | 40         | M          |
| 13                               | DIGE, ELISA              | 63         | F          |
| 14                               | DIGE                     | 26         | F          |
| 15                               | DIGE                     | 45         | F          |
| 16                               | DIGE                     | 56         | M          |
| 17                               | DIGE                     | 59         | F          |
| 18                               | DIGE                     | 31         | F          |
| 19                               | DIGE                     | 55         | M          |
| 20                               | DIGE                     | 50         | F          |
| <b><i>Confirmation Phase</i></b> |                          |            |            |
| 21                               | WB, SRM                  | 59         | M          |
| 22                               | WB, SRM, ELISA           | 60         | F          |
| 23                               | WB, SRM, ELISA           | 50         | F          |
| 24                               | WB, SRM                  | 60         | M          |
| 25                               | WB, SRM, ELISA           | 65         | M          |
| 26                               | WB, SRM                  | 40         | M          |
| 27                               | WB, ELISA                | 50         | F          |
| 28                               | WB                       | 56         | M          |
| 29                               | WB                       | 54         | F          |
| 30                               | WB, SRM                  | 48         | F          |
| 31                               | WB                       | 58         | F          |
| 32                               | WB                       | 37         | F          |
| 33                               | WB                       | 33         | F          |

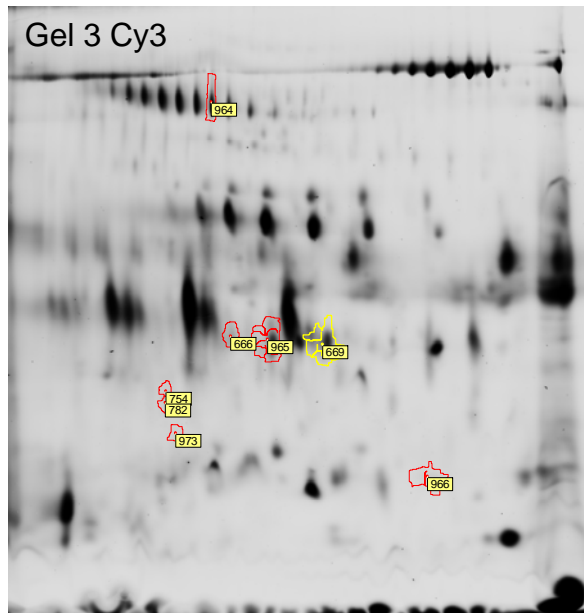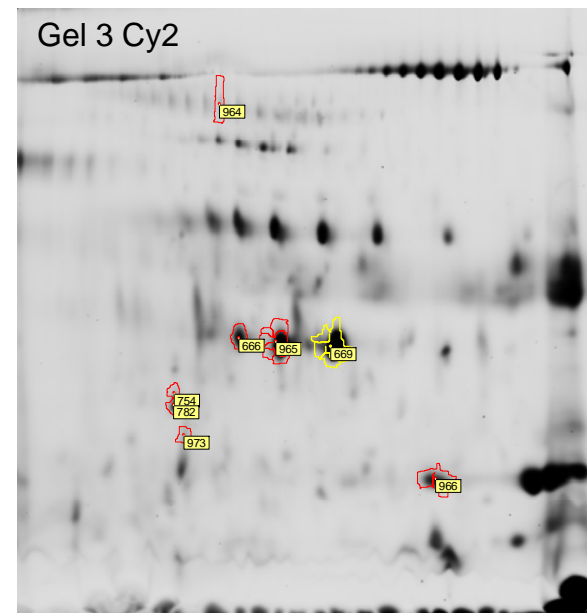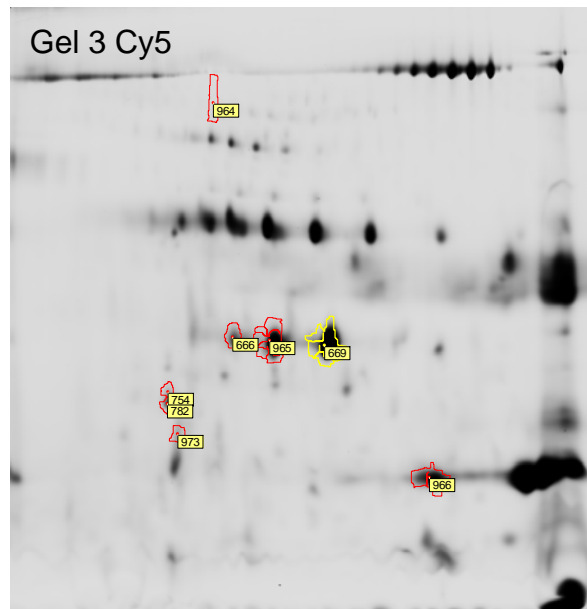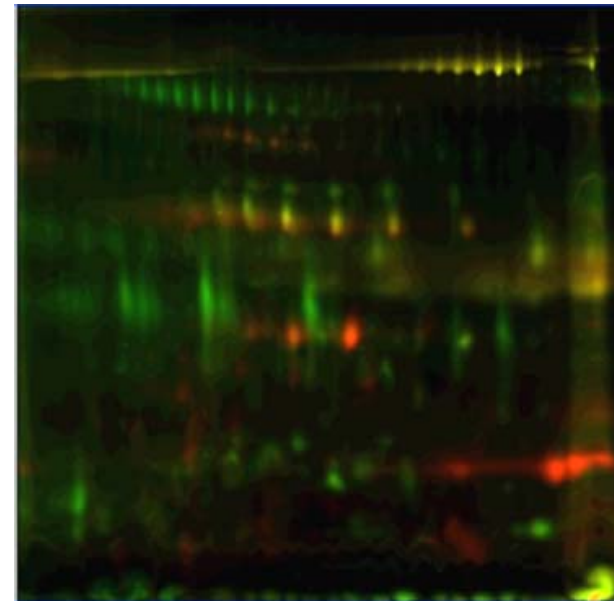

**Suppl. Fig. 1.** Representative DIGE images (differential spots are marked).

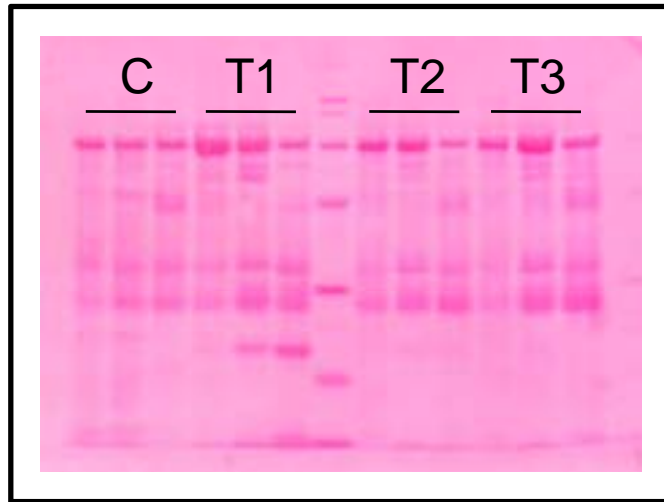

**A**

Representative Ponceau.

The same amount of total protein was loaded per lane (per sample).

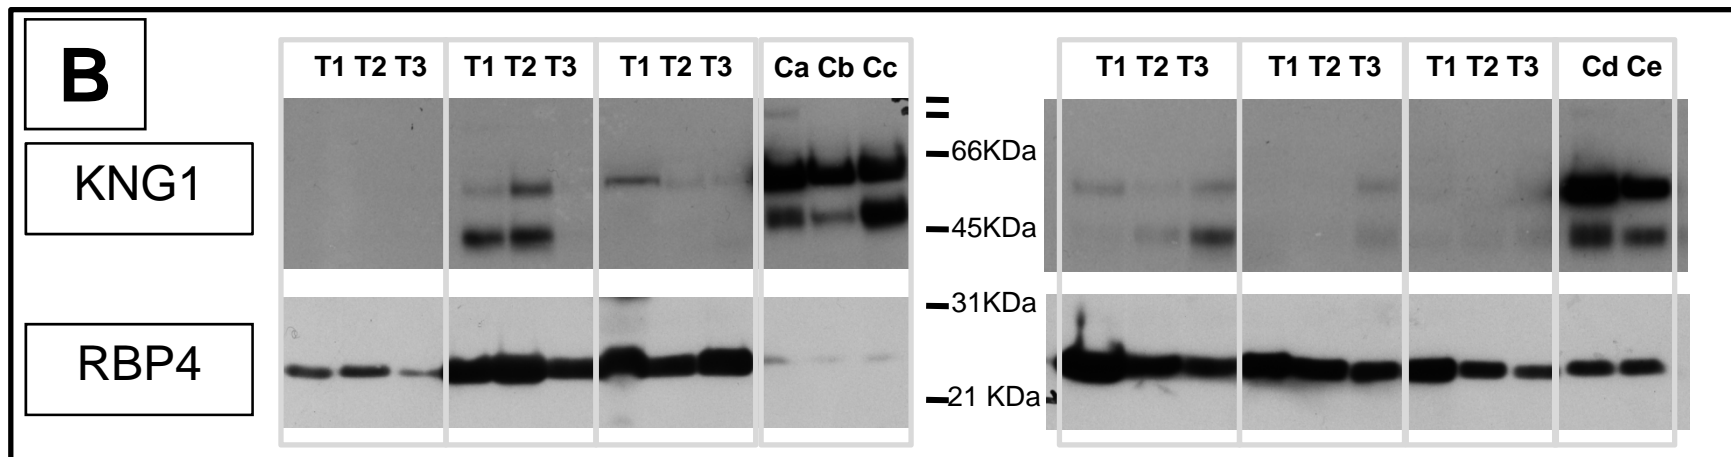

Representative WB images for KNG1 and RBP4.

C: control. T1,T2,T3: patients' samples at the different points of time.

**Suppl. Fig. 2.** Representative Ponceau image (A) and WB images for KNG1 and RBP4 (B).

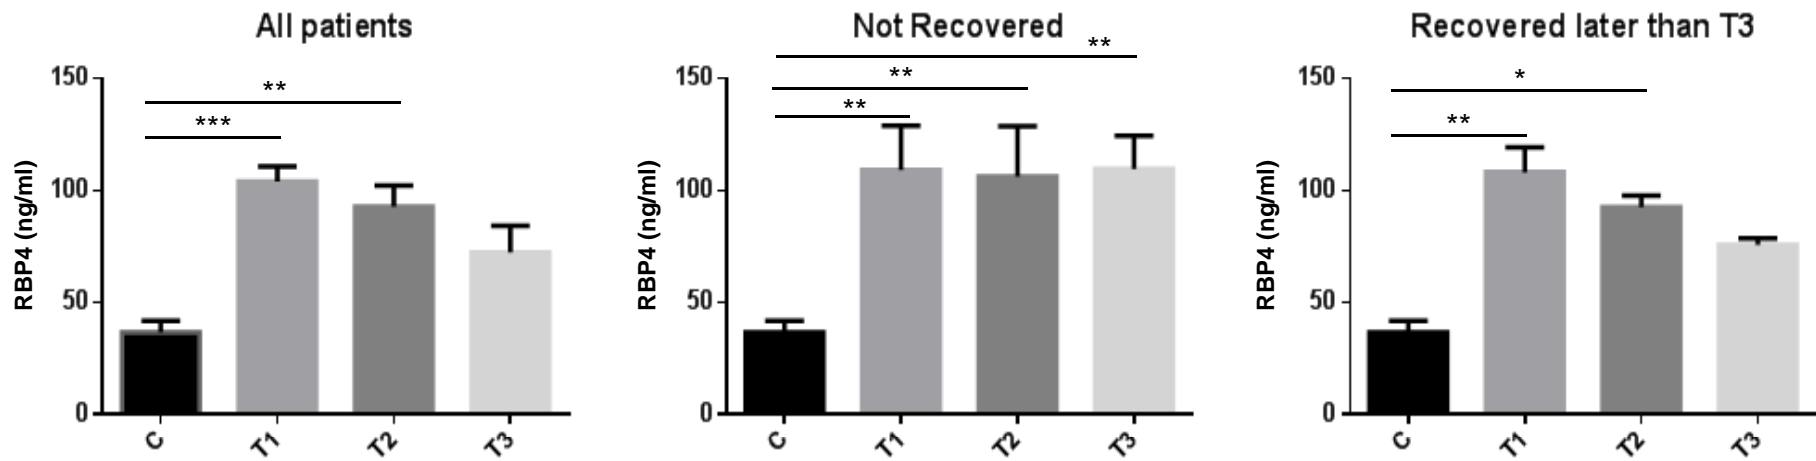

**Suppl. Fig. 3.** RBP4 response for control subjects (C) and AKI patients at different points of time (T1, T2 and T3) by ELISA assay.



## Summary DIGE analysis. Data report

8 spots were found significantly altered and submitted to MALDI-MS/MS analysis for protein identification. In the Table, altered spots and significant variation are shown.

| Master No. | Appearance | T1 / C  |           | T2 / C |           | T3 / C |           | T2 / T1 |           | T3 / T1 |           | T2 / T3 |           | ANOVA   |
|------------|------------|---------|-----------|--------|-----------|--------|-----------|---------|-----------|---------|-----------|---------|-----------|---------|
|            |            | T-test  | Av. Ratio | T-test | Av. Ratio | T-test | Av. Ratio | T-test  | Av. Ratio | T-test  | Av. Ratio | T-test  | Av. Ratio |         |
| 666        | 30 (30)    | 0.00038 | 9.97      | 0.0098 | 7.43      | 0.1    | 5.42      | 0.99    | -1.34     | 0.63    | -1.84     | 1       | -1.37     | 0.0018  |
| 669        | 30 (30)    | 0.00016 | 30.07     | 0.0091 | 23.74     | 0.1    | 20.65     | 0.99    | -1.27     | 0.63    | -1.46     | 1       | -1.15     | 0.00085 |
| 754        | 27 (30)    | 0.00077 | 19.06     | 0.0091 | 15.69     | 0.1    | 9.93      | 0.99    | -1.21     | 0.63    | -1.92     | 1       | -1.58     | 0.00085 |
| 782        | 30 (30)    | 0.0014  | 13.72     | 0.019  | 10.77     | 0.1    | 9.62      | 0.99    | -1.27     | 0.63    | -1.43     | 1       | -1.12     | 0.0014  |
| 964        | 27 (30)    | 0.0013  | -9.13     | 0.0091 | -5.57     | 0.074  | -5.76     | 0.99    | 1.64      | 0.63    | 1.58      | 1       | -1.03     | 0.00041 |
| 965        | 30 (30)    | 0.00038 | 13.64     | 0.0091 | 11.51     | 0.11   | 9.59      | 0.99    | -1.19     | 0.63    | -1.42     | 1       | -1.2      | 0.002   |
| 966        | 30 (30)    | 0.00016 | 32.9      | 0.0091 | 25.35     | 0.074  | 13.39     | 0.99    | -1.3      | 0.63    | -2.46     | 1       | -1.89     | 0.00041 |
| 973        | 24 (30)    | 0.00077 | 25.81     | 0.0091 | 18.47     | 0.1    | 9.6       | 0.99    | -1.4      | 0.63    | -2.69     | 1       | -1.92     | 0.00041 |

Master No.: spot code

Appearance: number of images (among the 30) in which the spot is quantifiable

Mass spectrometry data revealed proteins identification in all spots, except 666 and 973:

-669: Basement membrane-specific heparan sulphate proteoglycan core protein (P98160)

### **-754: Retinol binding protein4 (P02753)**

-782: Retinol-binding protein 4, Ig kappa chain V-I region OU (P01606), Serine palmitoyltransferase small subunit A (Q969W0), Ig heavy chain V-III region BUR (P01773), NADH-ubiquinone oxidoreductase chain 4L (P03901) and Reactive oxygen species modulator 1 (P60602).

### **-964: Kininogen-1 (P01042)**

-965: Retinol-binding protein 4 (P02753), Putative uncharacterized protein C1orf196 (B1AJZ1), Ig kappa chain V-I region OU (P01606), Ig kappa chain V-II region MIL (P01616), Reactive oxygen species modulator 1 (P60602), HERV-K\_10p14 provirus Rec protein (P61578), Nucleoside diphosphate kinase (O00746), mitochondrial and Ig heavy chain V-III region BUR (P01773).

-966: Polyubiquitin-B (P0CG47), Ubiquitin-60S (P62987), Ubiquitin-40S (P62979), Polyubiquitin-C (P0CG48).

Detail information on MALDI-MS/MS proteins identification follows for RBP4 and KNG1.

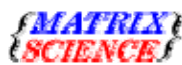

# Mascot Search Results

## Protein View

Match to: **P02753** Score: **62** Expect: **0.012**

**Retinol-binding protein 4** OS=Homo sapiens GN=RBP4 PE=1 SV=3

Nominal mass (M<sub>r</sub>): **23337**; Calculated pI value: **5.76**

NCBI BLAST search of [P02753](#) against nr

Unformatted [sequence string](#) for pasting into other applications

Taxonomy: [Homo sapiens](#)

Fixed modifications: Carbamidomethyl (C)

Variable modifications: Oxidation (M)

No enzyme cleavage specificity

**Sequence Coverage: 94%**

Matched peptides shown in **Bold Red**

**1 MKVWALLLL AALGSGRAER DCRVSSFRVK ENFDKARFSG TWYAMAKKDP**  
**51 EGLFLQDNIV AEFSVDETGQ MSATAKGRVR LLNNWDVCAD MVGTFTDTE**  
**101 PAKFKMKYWG VASFLQKGND DHWIVDTDYD TYAVQYSCRL LNLDTGCADS**  
**151 YSFVFSRDPN GLPPEAQKIV RQRQEELCLA RQYRLIVHNG YCDGRSERNL**  
**201 L**

Sort Peptides By

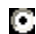

Residue Number

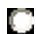

Increasing Mass

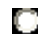

Decreasing

Mass

| Start - End Sequence                          | Observed         | Mr(expt)         | Mr(calc)         | ppm        | Miss       |
|-----------------------------------------------|------------------|------------------|------------------|------------|------------|
| <b>1 - 7</b><br><b>.MKVWAL.L</b>              | <b>949.5016</b>  | <b>948.4943</b>  | <b>948.4891</b>  | <b>5</b>   | <b>0 -</b> |
| Oxidation (M) ( <a href="#">No match</a> )    |                  |                  |                  |            |            |
| <b>3 - 9</b><br><b>K.WVWALL.L</b>             | <b>900.4811</b>  | <b>899.4738</b>  | <b>899.5269</b>  | <b>-59</b> | <b>0</b>   |
| ( <a href="#">No match</a> )                  |                  |                  |                  |            |            |
| <b>3 - 17</b><br><b>K.WVWALLLLAALGSGR.A</b>   | <b>1626.0590</b> | <b>1625.0517</b> | <b>1624.9453</b> | <b>65</b>  | <b>0</b>   |
| ( <a href="#">No match</a> )                  |                  |                  |                  |            |            |
| <b>5 - 14</b><br><b>V.WALLLLAALG.S</b>        | <b>1040.5811</b> | <b>1039.5738</b> | <b>1039.6430</b> | <b>-67</b> | <b>0</b>   |
| ( <a href="#">No match</a> )                  |                  |                  |                  |            |            |
| <b>17 - 32</b><br><b>G.RAERDCRVSSFRVKEN.F</b> | <b>2009.0259</b> | <b>2008.0186</b> | <b>2008.0021</b> | <b>8</b>   | <b>0</b>   |
| ( <a href="#">No match</a> )                  |                  |                  |                  |            |            |
| <b>24 - 35</b><br><b>R.VSSFRVKENFDK.A</b>     | <b>1455.8405</b> | <b>1454.8332</b> | <b>1454.7518</b> | <b>56</b>  | <b>0</b>   |
| ( <a href="#">No match</a> )                  |                  |                  |                  |            |            |
| <b>25 - 32</b><br><b>V.SSFRVKEN.F</b>         | <b>966.5125</b>  | <b>965.5052</b>  | <b>965.4930</b>  | <b>13</b>  | <b>0</b>   |
| ( <a href="#">No match</a> )                  |                  |                  |                  |            |            |
| <b>26 - 32</b><br><b>S.SFRVKEN.F</b>          | <b>879.4815</b>  | <b>878.4742</b>  | <b>878.4610</b>  | <b>15</b>  | <b>0</b>   |
| ( <a href="#">No match</a> )                  |                  |                  |                  |            |            |
| <b>30 - 36</b><br><b>V.KENFDKA.R</b>          | <b>851.4745</b>  | <b>850.4672</b>  | <b>850.4185</b>  | <b>57</b>  | <b>0</b>   |
| ( <a href="#">No match</a> )                  |                  |                  |                  |            |            |
| <b>32 - 46</b><br><b>E.NFDKARFSGTWYAMA.K</b>  | <b>1780.9094</b> | <b>1779.9021</b> | <b>1779.8039</b> | <b>55</b>  | <b>0</b>   |
| Oxidation (M) ( <a href="#">No match</a> )    |                  |                  |                  |            |            |

|                          |                                            |           |           |     |   |
|--------------------------|--------------------------------------------|-----------|-----------|-----|---|
| 33 - 39                  | 870.4823                                   | 869.4750  | 869.4395  | 41  | 0 |
| N.FDKARFS.G              | ( <a href="#">No match</a> )               |           |           |     |   |
| 42 - 48                  | 897.4965                                   | 896.4892  | 896.4578  | 35  | 0 |
| T.WYAMAKK.D              | ( <a href="#">No match</a> )               |           |           |     |   |
| 42 - 48                  | 913.5018                                   | 912.4945  | 912.4527  | 46  | 0 |
| T.WYAMAKK.D              | Oxidation (M) ( <a href="#">No match</a> ) |           |           |     |   |
| 46 - 53                  | 857.4810                                   | 856.4737  | 856.4654  | 10  | 0 |
| M.AKKDPEGL.F             | ( <a href="#">No match</a> )               |           |           |     |   |
| 54 - 61                  | 919.4905                                   | 918.4832  | 918.4811  | 2   | 0 |
| L.FLQDNIVA.E             | ( <a href="#">No match</a> )               |           |           |     |   |
| 57 - 73                  | 1828.8070                                  | 1827.7997 | 1827.7833 | 9   | 0 |
| Q.DNIVAEFSVDETGQMSA.T    | Oxidation (M) ( <a href="#">No match</a> ) |           |           |     |   |
| 67 - 76                  | 1023.5563                                  | 1022.5490 | 1022.4702 | 77  | 0 |
| D.ETGQMSATAK.G           | ( <a href="#">No match</a> )               |           |           |     |   |
| 68 - 77                  | 951.4855                                   | 950.4782  | 950.4491  | 31  | 0 |
| E.TGQMSATAK.G.R          | ( <a href="#">No match</a> )               |           |           |     |   |
| 69 - 78                  | 1006.5499                                  | 1005.5426 | 1005.5025 | 40  | 0 |
| T.GQMSATAKGR.V           | ( <a href="#">No match</a> )               |           |           |     |   |
| 73 - 80                  | 858.4791                                   | 857.4718  | 857.5195  | -56 | 0 |
| S.ATAKGRVR.L             | ( <a href="#">No match</a> )               |           |           |     |   |
| 76 - 91                  | 1962.9795                                  | 1961.9722 | 1961.9564 | 8   | 0 |
| A.KGRVRLLNWDVDCADM.V     | Oxidation (M) ( <a href="#">No match</a> ) |           |           |     |   |
| 78 - 96                  | 2283.1328                                  | 2282.1255 | 2282.0936 | 14  | 0 |
| G.RVRLLNWDVDCADMVGTF.T.D | Oxidation (M) ( <a href="#">No match</a> ) |           |           |     |   |
| 80 - 86                  | 930.5290                                   | 929.5217  | 929.4719  | 54  | 0 |
| V.RLLNWD.V               | ( <a href="#">No match</a> )               |           |           |     |   |
| 100 - 107                | 980.5288                                   | 979.5215  | 979.5161  | 6   | 0 |
| E.DPAKFKMK.Y             | Oxidation (M) ( <a href="#">No match</a> ) |           |           |     |   |
| 101 - 107                | 865.4801                                   | 864.4728  | 864.4891  | -19 | 0 |
| D.PAKFKMK.Y              | Oxidation (M) ( <a href="#">No match</a> ) |           |           |     |   |
| 101 - 108                | 1028.5676                                  | 1027.5603 | 1027.5524 | 8   | 0 |
| D.PAKFKMKY.W             | Oxidation (M) ( <a href="#">No match</a> ) |           |           |     |   |
| 102 - 108                | 915.5029                                   | 914.4956  | 914.5048  | -10 | 0 |
| P.AKFKMKY.W              | ( <a href="#">No match</a> )               |           |           |     |   |
| 103 - 108                | 860.4777                                   | 859.4704  | 859.4626  | 9   | 0 |
| A.KFKMKY.W               | Oxidation (M) ( <a href="#">No match</a> ) |           |           |     |   |
| 104 - 109                | 902.4962                                   | 901.4889  | 901.4520  | 41  | 0 |
| K.FKMKYW.G               | ( <a href="#">No match</a> )               |           |           |     |   |
| 105 - 111                | 911.4979                                   | 910.4906  | 910.4735  | 19  | 0 |
| F.KMKYWGV.A              | ( <a href="#">No match</a> )               |           |           |     |   |
| 111 - 119                | 963.5157                                   | 962.5084  | 962.5185  | -10 | 0 |
| G.VASFLQKGN.D            | ( <a href="#">No match</a> )               |           |           |     |   |
| 118 - 132                | 1828.8070                                  | 1827.7997 | 1827.7224 | 42  | 0 |
| K.GNDDHWIVDTDYDTY.A      | ( <a href="#">Ions score 63</a> )          |           |           |     |   |
| 134 - 140                | 925.5018                                   | 924.4945  | 924.4487  | 50  | 0 |
| A.VQYSCRL.L              | ( <a href="#">No match</a> )               |           |           |     |   |
| 137 - 143                | 875.4949                                   | 874.4876  | 874.4695  | 21  | 0 |
| Y.SCRLNL.D               | ( <a href="#">No match</a> )               |           |           |     |   |
| 140 - 148                | 976.4985                                   | 975.4912  | 975.4695  | 22  | 0 |
| R.LLNLDGTCA.D            | ( <a href="#">No match</a> )               |           |           |     |   |
| 153 - 159                | 867.4841                                   | 866.4768  | 866.4287  | 56  | 0 |
| S.FVFSRDP.N              | ( <a href="#">No match</a> )               |           |           |     |   |
| 154 - 161                | 891.4908                                   | 890.4835  | 890.4246  | 66  | 0 |
| F.VFSRDPNG.L             | ( <a href="#">No match</a> )               |           |           |     |   |
| 158 - 166                | 909.4955                                   | 908.4882  | 908.4239  | 71  | 0 |
| R.DPNGLPPEA.Q            | ( <a href="#">No match</a> )               |           |           |     |   |
| 163 - 170                | 881.4819                                   | 880.4746  | 880.5018  | -31 | 0 |
| L.PPEAQKIV.R             | ( <a href="#">No match</a> )               |           |           |     |   |
| 170 - 176                | 944.4992                                   | 943.4919  | 943.4835  | 9   | 0 |
| I.VRQRQEE.L              | ( <a href="#">No match</a> )               |           |           |     |   |

|              |                              |           |           |     |   |
|--------------|------------------------------|-----------|-----------|-----|---|
| 176 - 183    | 1052.5734                    | 1051.5661 | 1051.5120 | 51  | 0 |
| E.ELCLARQY.R | ( <a href="#">No match</a> ) |           |           |     |   |
| 182 - 189    | 1042.5443                    | 1041.5370 | 1041.5719 | -34 | 0 |
| R.QYRLIVHN.G | ( <a href="#">No match</a> ) |           |           |     |   |
| 193 - 200    | 946.5038                     | 945.4965  | 945.4628  | 36  | 0 |
| C.DGRSERNL.L | ( <a href="#">No match</a> ) |           |           |     |   |

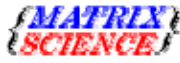

# Mascot Search Results

## Protein View

Match to: **P01042** Score: **82** Expect: **0.00012**

**Kininogen-1 OS=Homo sapiens GN=KNG1 PE=1 SV=2**

Nominal mass ( $M_r$ ): **72996**; Calculated pI value: **6.34**

NCBI BLAST search of [P01042](#) against nr

Unformatted [sequence string](#) for pasting into other applications

Taxonomy: [Homo sapiens](#)

Fixed modifications: Carbamidomethyl (C)

Variable modifications: Oxidation (M)

Cleavage by Trypsin: cuts C-term side of KR unless next residue is P

Sequence Coverage: **12%**

Matched peptides shown in **Bold Red**

```

1 MKLITILFLC SRLLLSLTQE SQSEEIDCND KDLFKAVDAA LKKYNSQNQS
51 NNQFVLYRIT EATKTVGSDT FYSFKYEIKE GDCPVQSGKT WQDCEYKDA
101 KAATGECTAT VGKRSSTKFS VATQTCQITP AEGPVVTAQY DCLGCVHPIS
151 TQSPDLEPIL RHGIQYFNNN TQHSSLFMLN EVKRAQRQVV AGLNFRITYS
201 IVQTNCSKEN FLFLTPDCKS LWNGDTGECT DNAYIDIQLR IASFSQNCDI
251 YPGKDFVQPP TKICVGCPRD IPTNSPELEE TLHTITIKLN AENNATFYFK
301 IDNVKKARVQ VVAGKKYFID FVARETTCSK ESNEELTESC ETKKLGQSLD
351 CNAEVYVVPW EKKIYPTVNC QPLGMISLMK RPPGFSPFRS SRIGEIKEET
401 TVSPPHTSMA PAQDEERDSG KEQGHTRRHD WGHEKQRKHN LGHGHKHERD
451 QGHGHRGHHG LGHGHEQQHG LGHGHKFKLD DDLEHQGGHV LDHGHKHKHG
501 HGHGKHKNGK KKNKGKNGWK TEHLASSED STTPSAQTQE KTEGPTPIPS
551 LAKPGVTVTF SDFQSDLIA TMMPPISPAP IQSDDDWIPD IQIDPNGLSF
601 NPISDFPDTT SPKCPGRPWK SVSEINPTTQ MKESYYFDLT DGLS

```

Show predicted peptides also

Sort Peptides By

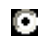

Residue Number

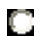

Increasing Mass

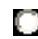

Decreasing Mass

Mass

| Start - End Sequence                           | Observed                                  | $M_r$ (expt) | $M_r$ (calc) | ppm | Miss |
|------------------------------------------------|-------------------------------------------|--------------|--------------|-----|------|
| 65 - 75<br><b>K.TVGS</b> DT <b>FYSFK</b> .Y    | 1251.6255<br>( <a href="#">No match</a> ) | 1250.6182    | 1250.5819    | 29  | 0    |
| 102 - 113<br><b>K.AA</b> TGECTAT <b>VGK</b> .R | 1165.6155<br>( <a href="#">No match</a> ) | 1164.6082    | 1164.5445    | 55  | 0    |
| 188 - 196<br><b>R.QVV</b> AGLNFR.I             | 1003.6064<br>( <a href="#">No match</a> ) | 1002.5991    | 1002.5611    | 38  | 0    |

|                        |                 |           |           |     |   |
|------------------------|-----------------|-----------|-----------|-----|---|
| 209 - 219              | 1383.6929       | 1382.6856 | 1382.6540 | 23  | 0 |
| K.ENFLFLTPDCK.S        | (Ions score 37) |           |           |     |   |
| 317 - 324              | 1030.5754       | 1029.5681 | 1029.5284 | 39  | 0 |
| K.YFIDFVAR.E           | (No match)      |           |           |     |   |
| 317 - 324              | 1030.5754       | 1029.5681 | 1029.5284 | 39  | 0 |
| K.YFIDFVAR.E           | (Ions score 21) |           |           |     |   |
| 345 - 363              | 2235.2185       | 2234.2112 | 2234.1041 | 48  | 1 |
| K.LGQSLDCNAEVVVPWEKK.I | (No match)      |           |           |     |   |
| 381 - 389              | 1060.5465       | 1059.5392 | 1059.5614 | -21 | 0 |
| K.RPPGFSPFR.S          | (No match)      |           |           |     |   |
| 381 - 389              | 1060.5465       | 1059.5392 | 1059.5614 | -21 | 0 |
| K.RPPGFSPFR.S          | (No match)      |           |           |     |   |

SRM analysis conditions in a QQQ-LC/MS/MS.

| <i>Protein name</i> | <i>Precursor mass(charge)</i> | <i>Fragment mass</i>                | <i>Peptide sequence</i> | <i>Collision energy</i> |
|---------------------|-------------------------------|-------------------------------------|-------------------------|-------------------------|
| RBP4                | 813.48(+2)                    | 970.60(+1)<br>857.52(+1)            | WVWALLLLAALGSGR         | 25.9                    |
| KNG1                | 713.70(+3)                    | 956.0(+2)<br>856.9(+2)<br>637.7(+3) | DIPTNSPELEETLTHITK      | 16.6                    |
